# Supplementary material for: Characterisation of molecular motions in cryo-EM single-particle data by multi-body refinement in RELION
Source: eLife journal article supplement (doi:10.7554/elife.36861), 2018-06-01
Supplement: supp [file elife_poa_e36861_Figure_1_figure_supplement_1.pdf › elife_poa_e36861_Figure_1_figure_supplement_1.pdf]

```
data_  
loop_  
_rlnBodyMaskName  
_rlnBodyRotateRelativeTo  
_rlnBodySigmaAngles  
_rlnBodySigmaOffset  
M_mask.mrc 2 10 2  
R_mask.mrc 1 10 2  
C_mask.mrc 2 10 2
```
